# Supplementary material for: CNOT3 Is a Modifier of PRPF31 Mutations in Retinitis Pigmentosa with Incomplete Penetrance
Source: PubMed Central journal article supplement (PMC3493449; doi:10.1371/journal.pgen.1003040), 2012-11-08
Supplement: pgen.1003040.s007.pdf [file pgen.1003040.s007.pdf]

**Table S4.** Primers for *CNOT3* long-range PCR amplification.

| PCR | Forward primer (5'-3')         | Reverse primer (5'-3')           | Amplification product (kbp) |
|-----|--------------------------------|----------------------------------|-----------------------------|
| #1  | GGGCTACGAACTGAAGGATGAGATCGAG   | ACCTCAAATCCAGAAAAGCAGCCATACCAATA | 11.8                        |
| #2  | CCTCCCTCACCCTGCCTGAGTATGAG     | CCCACCGTCCTATCCTGCTACACCCACTATCT | 11.2                        |
| #3  | CTGGGICTCTTTTCCTTCTTTGGTTGCACT | TGTTTCAGAGCCCTTTTCTCCGTGCCT      | 11.2                        |
