# Supplementary material for: CNOT3 Is a Modifier of PRPF31 Mutations in Retinitis Pigmentosa with Incomplete Penetrance
Source: PLOS journal article supplement (doi:10.1371/journal.pgen.1003040), 2012-11-08
Supplement: S1 (10.1371/journal.pgen.1003040.s001) [file journal.pgen.1003040.s001]

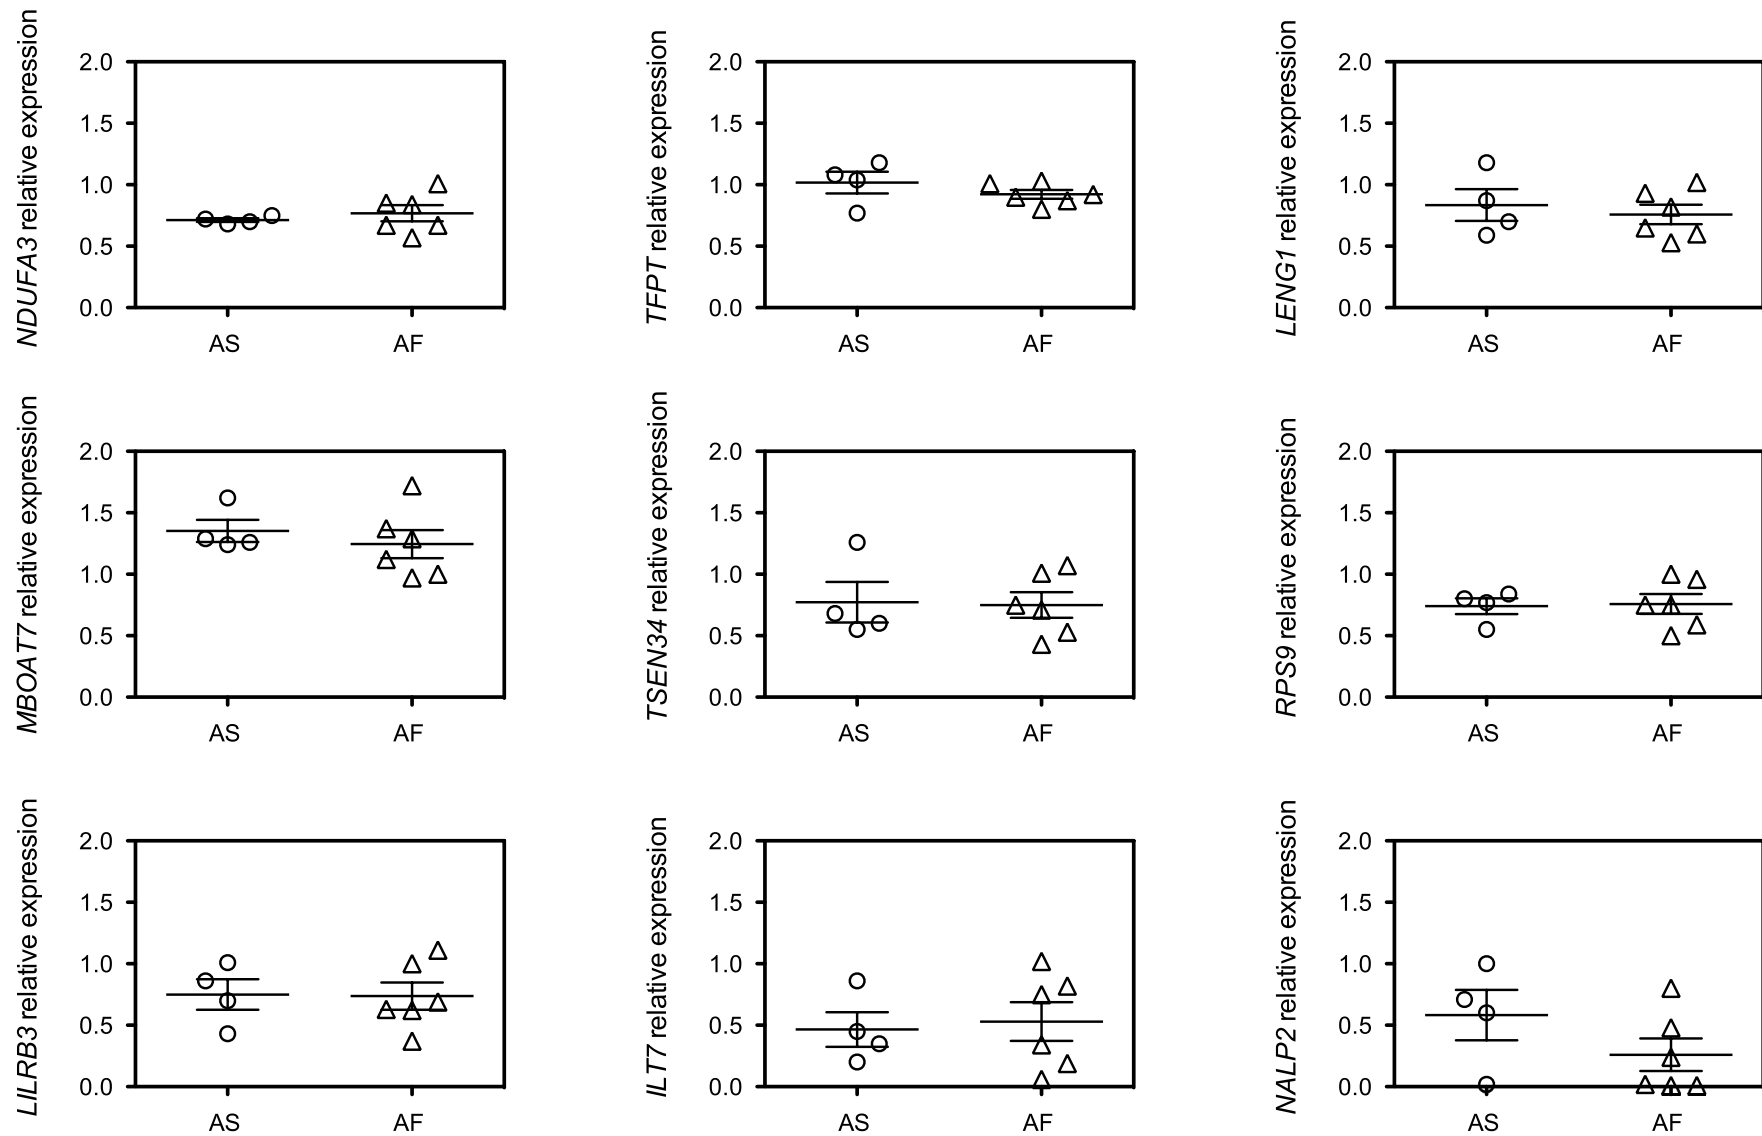

**Figure S1.** Gene expression analysis of candidate genes in LCLs derived from asymptomatic (AS) and affected (AF) carriers of mutations. mRNA expression of each gene is normalized to the housekeeping gene *GAPDH*. Error bars refer to the standard deviation of the mean for each group.
