# Supplementary material for: CNOT3 Is a Modifier of PRPF31 Mutations in Retinitis Pigmentosa with Incomplete Penetrance
Source: PLOS journal article supplement (doi:10.1371/journal.pgen.1003040), 2012-11-08
Supplement: S3 (10.1371/journal.pgen.1003040.s003) [file journal.pgen.1003040.s003]

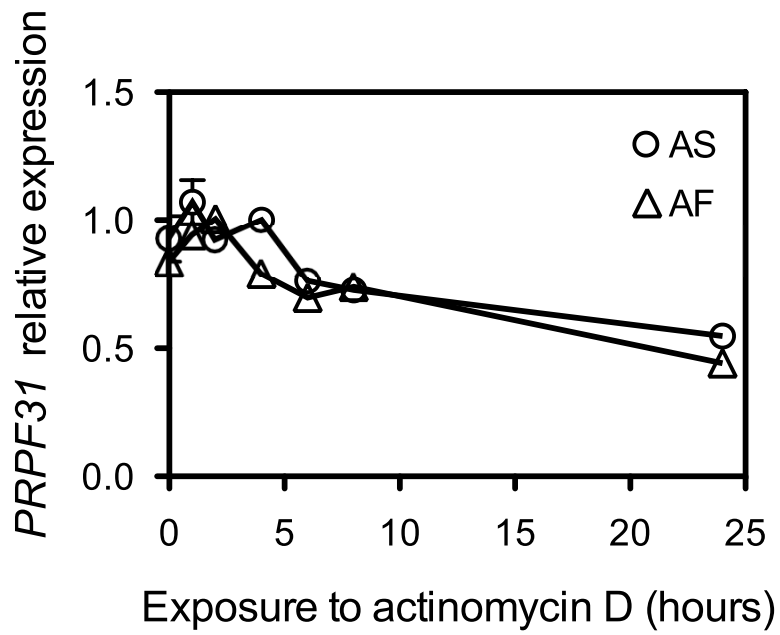

**Figure S3.** *PRPF31* mRNA decay in LCLs from asymptomatic and affected carriers of mutations, following treatment with actinomycin D. mRNA half-life is similar in both groups. Error bars refer to the standard deviation of the mean at different time points for at least three independent experiments.
